# Supplementary material for: Steam Electrolysis vs. Co-Electrolysis: Mechanistic Studies of Long-Term Solid Oxide Electrolysis Cells
Source: MDPI journal article supplement (doi:10.3390/en15155449), 2022-07-27
Supplement: s1 [file s1]

# Steam Electrolysis vs Co-electrolysis: Mechanistic Studies of Long-Term Solid Oxide Electrolysis Cells

Stephanie E. Wolf <sup>1,2</sup>, Vaibhav Vibhu<sup>1,\*</sup>, Eric Tröster <sup>1</sup>, Izaak C. Vinke <sup>1</sup>, Rüdiger-A. Eichel <sup>1,2</sup> and L.G.J. (Bert) de Haart <sup>1</sup>

<sup>1</sup> Institute of Energy and Climate Research, Fundamental Electrochemistry (IEK-9), Forschungszentrum Jülich GmbH, 52425 Jülich, Germany; erictroester@gmail.com (E.T.); i.c.vinke@fz-juelich.de (I.C.V.); r.eichel@fz-juelich.de (R.-A.E.); l.g.j.de.haart@fz-juelich.de (L.G.J.d.H.)  
<sup>2</sup> Institute of Physical Chemistry, RWTH Aachen University, 52074 Aachen, Germany  
\* Correspondence: v.vibhu@fz-juelich.de; Tel.: +49-2461-61-6553

## Supplementary Information

Table S1. Reduction of NiO in the cermet fuel electrode at 900 °C.

| Reduction step | H <sub>2</sub> / % | N <sub>2</sub> / % |
|----------------|--------------------|--------------------|
| 1              | 0                  | 100.0              |
| 2              | 7.7                | 92.3               |
| 3              | 14.3               | 85.7               |
| 4              | 25.0               | 75.0               |
| 5              | 33.3               | 66.7               |
| 6              | 44.4               | 55.6               |
| 7              | 55.6               | 44.4               |
| 8              | 66.7               | 33.3               |
| 9              | 77.8               | 22.2               |
| 10             | 88.9               | 11.1               |

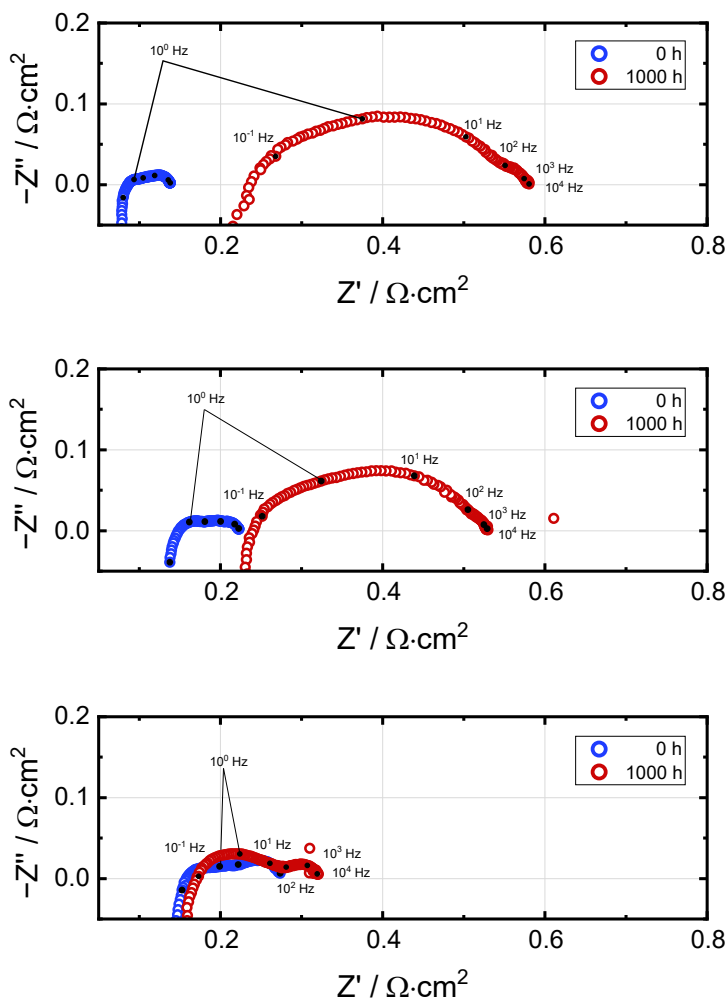

**Figure S1.** EIS measurements with the single cells at OCV at 0 h and 1000 h with 9 l·h<sup>-1</sup> fuel consisting of (a) 50% H<sub>2</sub> + 50% H<sub>2</sub>O at 800 °C and (b) 50% H<sub>2</sub> + 50% H<sub>2</sub>O at 750 °C and (c) 40% H<sub>2</sub>O + 40% CO<sub>2</sub> + 20% H<sub>2</sub> at 800 °C.

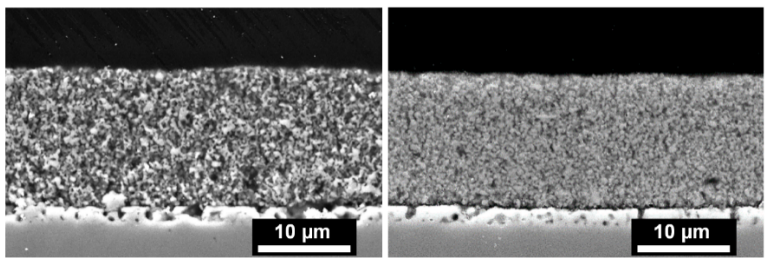

**Figure S2.** SEM-images at 20 keV of the oxygen electrode of the cell (a) after the durability test at 750 °C and 50% H<sub>2</sub> + 50% H<sub>2</sub>O for 1000 h and (b) the durability test at 800 °C with 40% H<sub>2</sub>O + 40% CO<sub>2</sub> + 20% H<sub>2</sub> at for 1000 h.

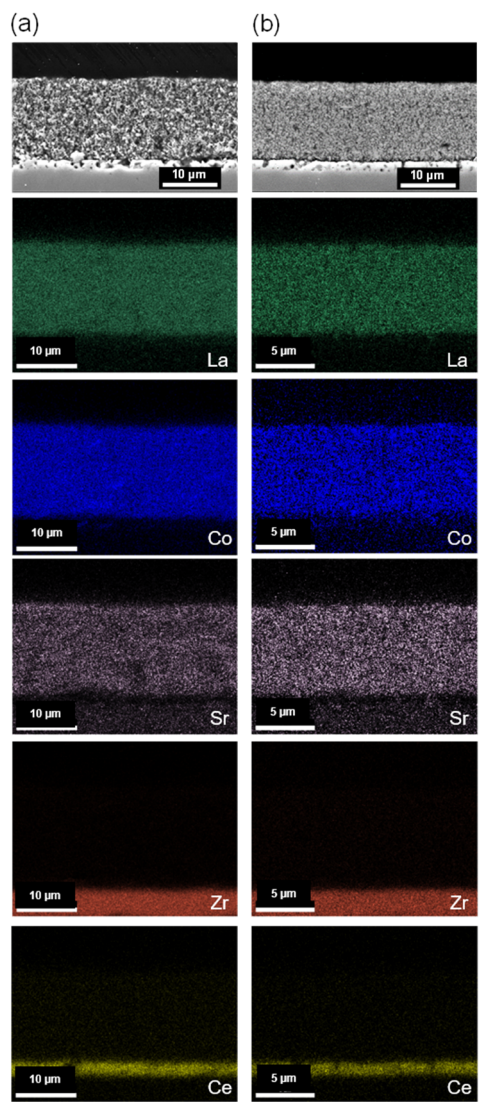

**Figure S3.** SEM-EDX mapping of single cells towards oxygen electrode side for La (La, 4.65 keV), Co (K $\alpha$ , 6.92 keV), Sr (La, 1.81 keV), Ce (La, 4.84 keV) and Zr (La, 2.04 keV) (a) after the durability test at 750 °C and 50% H<sub>2</sub> + 50% H<sub>2</sub>O for 1000 h and (b) the durability test at 800 °C with 40% H<sub>2</sub>O + 40% CO<sub>2</sub> + 20% H<sub>2</sub> at for 1000 h.

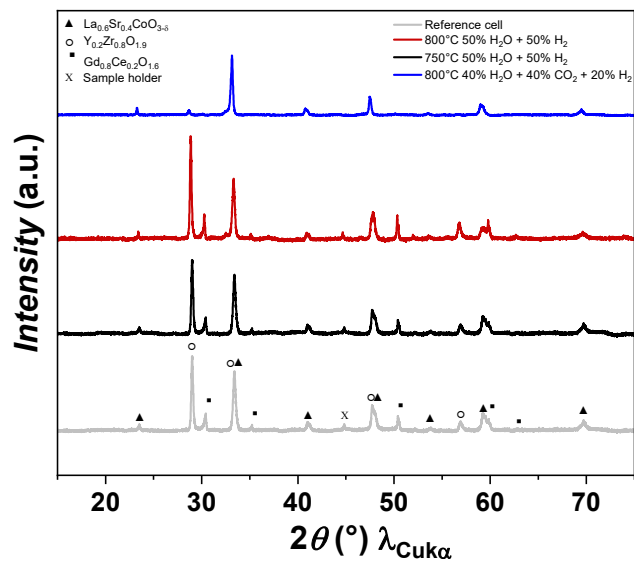

**Figure S4.** XRD-image of the oxygen electrode of the cell before and after the durability tests for 1000 h.

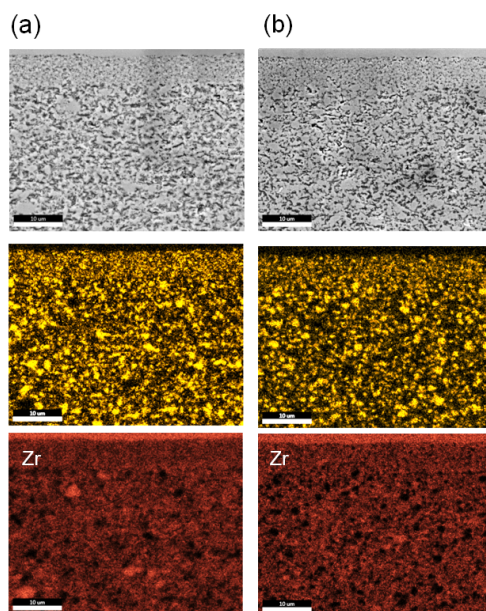

**Figure S5.** SEM-EDX mapping of single cells towards fuel electrode side for Ni ( $K\alpha$ , 7.47 keV), Zr ( $L\alpha$ , 1.81 keV) line (a) after the durability test at 750 °C and 50%  $H_2$  + 50%  $H_2O$  for 1000 h and (b) the durability test at 800 °C with 40%  $H_2O$  + 40%  $CO_2$  + 20%  $H_2$  at for 1000 h.
